# Supplementary material for: Advancing nearshore and onshore tsunami hazard approximation with machine learning surrogates
Source: Copernicus journal article supplement (doi:10.5194/nhess-2024-72), 2024-05-13
Supplement: Supplementary file 1 [file nhess-2024-72-supplement.pdf]

## Validation of GeoClaw model using 2011 Tohoku event

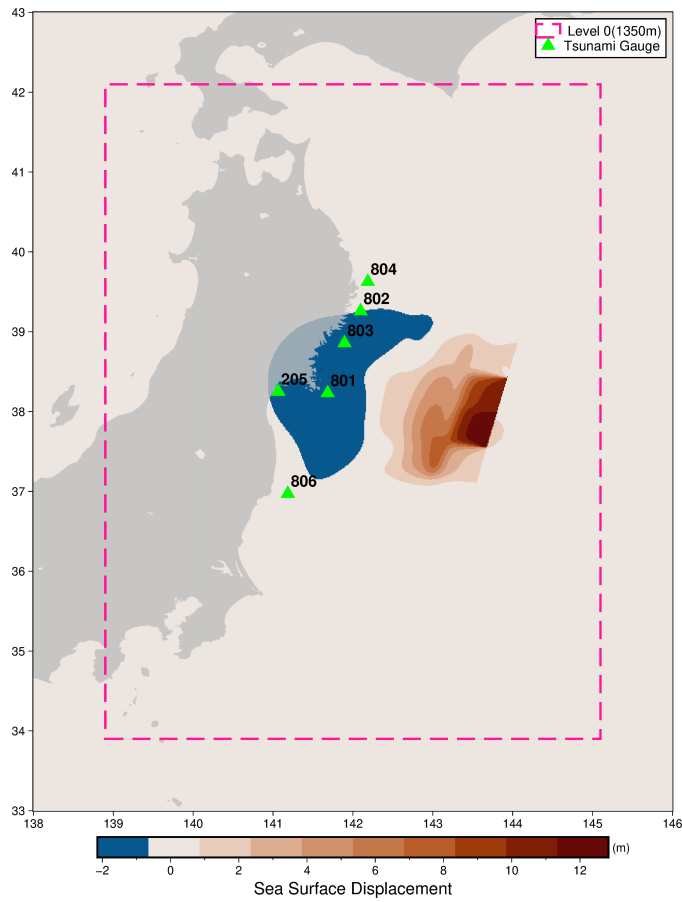

(a) Initial Displacement

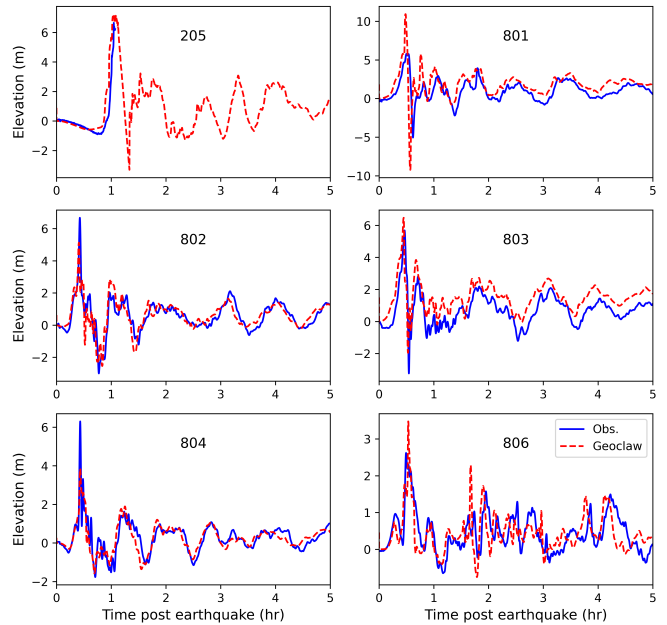

(b) Waveforms at gauge site marked in figure 3a

**Figure S1.** Plots of simulated tsunami inundation using source (Fujii et al., 2011) compared to the actual observation for the 2011 Tohoku tsunami event

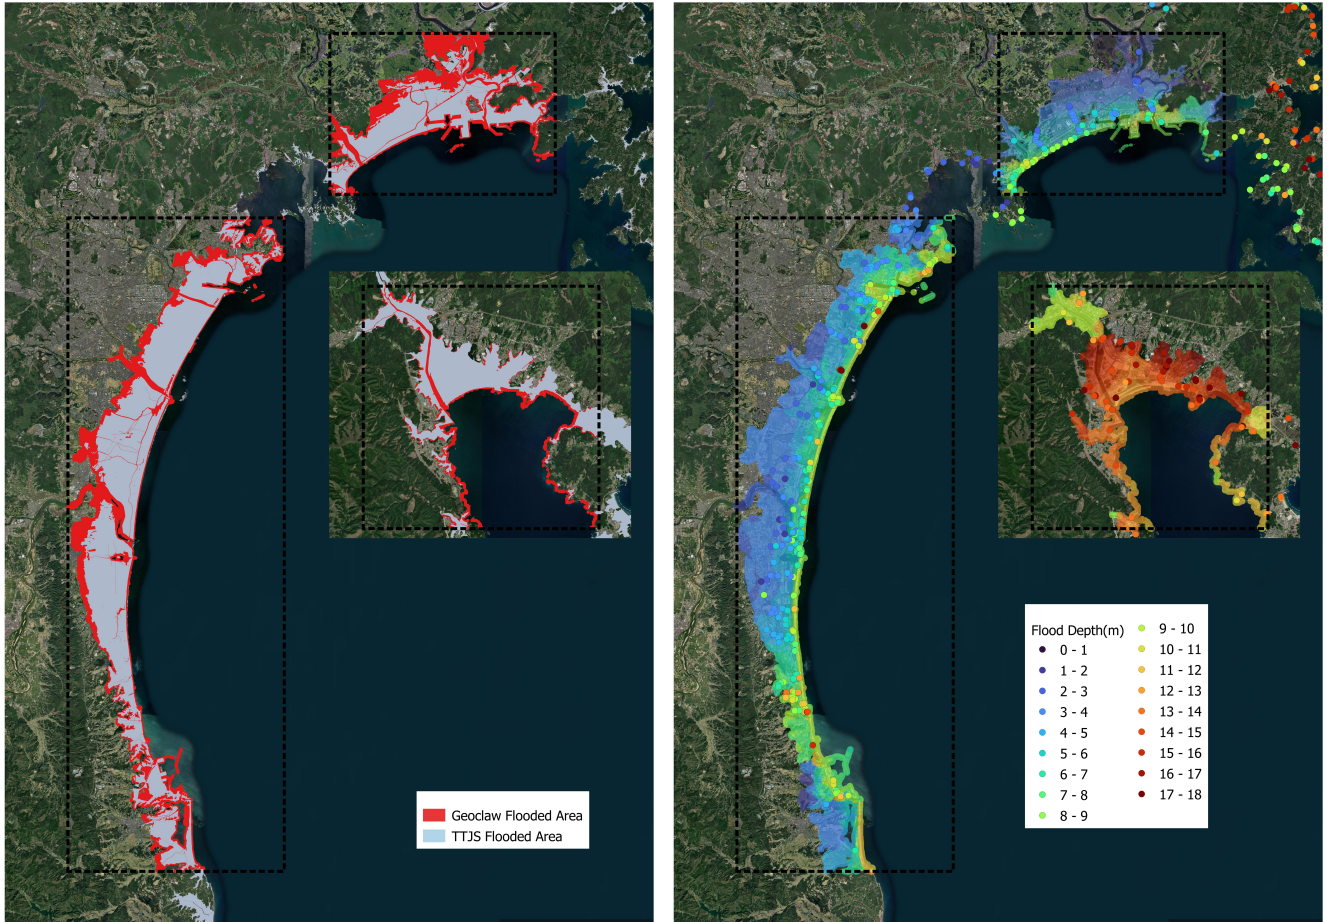

(a) Flooded Area

(b) Flooded Depth

**Figure S2.** Plots of simulated tsunami inundation using source (Fujii et al., 2011) compared to the actual observation for the 2011 Tohoku tsunami event.(Basemap from ESRI World Imagery)

**Table S1.** Model Parameters of the VED network - Nearshore

| Layer Number                | Layer Type      | Input Channels or Size | Output Channels or Size | Activation          | Pooling Operation  |
|-----------------------------|-----------------|------------------------|-------------------------|---------------------|--------------------|
| <b>Offshore Encoder</b>     |                 |                        |                         |                     |                    |
| 1                           | Conv1d          | input                  | 64                      | Leaky ReLU<br>(0.5) | MaxPool1d<br>(2x2) |
| 2                           | Conv1d          | 64                     | 64                      | Leaky ReLU<br>(0.5) | MaxPool1d<br>(2x2) |
| 3                           | Conv1d          | 64                     | 128                     | Leaky ReLU<br>(0.5) | MaxPool1d<br>(2x2) |
| 4                           | Conv1d          | 128                    | 128                     | Leaky ReLU<br>(0.5) | MaxPool1d<br>(2x2) |
| 5                           | Linear          | [8192]                 | [2 x Zdim]              |                     |                    |
| <b>Variational Encoding</b> |                 |                        |                         |                     |                    |
| 6                           | Reparametrise   | [2 x Zdim]             | [Zdim]                  |                     |                    |
| <b>Nearshore Decoder</b>    |                 |                        |                         |                     |                    |
| 7                           | Linear          | [Zdim]                 | [128 x 64]              |                     |                    |
| 8                           | ConvTranspose1d | 128                    | 128                     | Leaky ReLU<br>(0.5) | MaxPool1d<br>(2x2) |
| 9                           | ConvTranspose1d | 128                    | 64                      | Leaky ReLU<br>(0.5) | MaxPool1d<br>(2x2) |
| 10                          | ConvTranspose1d | 64                     | 64                      | Leaky ReLU<br>(0.5) | MaxPool1d<br>(2x2) |
| 11                          | ConvTranspose1d | 64                     | output                  | Leaky ReLU<br>(0.5) | MaxPool1d<br>(2x2) |

**Table S2.** Model Parameters of the VED network - Onshore

| Layer Number                | Layer Type    | Input Channels [Size] | Output Channels [Size] | Activation       | Pooling Operation | Other Operations |
|-----------------------------|---------------|-----------------------|------------------------|------------------|-------------------|------------------|
| <b>Offshore Encoder</b>     |               |                       |                        |                  |                   |                  |
| 1                           | Conv1d        | input                 | 64                     | Leaky ReLU (0.5) | MaxPool1d (4x4)   | BatchNorm1d      |
| 2                           | Conv1d        | 64                    | 64                     | Leaky ReLU (0.5) | MaxPool1d (4x4)   |                  |
| 3                           | Conv1d        | 64                    | 128                    | Leaky ReLU (0.5) | MaxPool1d (4x4)   |                  |
| 4                           | Conv1d        | 128                   | 128                    | Leaky ReLU (0.5) | MaxPool1d (4x4)   | Dropout (0.1)    |
| 5                           | Linear        | [512]                 | [2 x Zdim]             |                  |                   |                  |
| <b>Variational Encoding</b> |               |                       |                        |                  |                   |                  |
| 6                           | Reparametrise | [2 x Zdim]            | [Zdim]                 |                  |                   |                  |
| <b>Onshore Decoder</b>      |               |                       |                        |                  |                   |                  |
| 7                           | Linear        | [Zdim]                | [64]                   |                  |                   |                  |
| 8                           | Linear        | [64]                  | output                 |                  |                   |                  |

## Performance metrics for the generalisation test using historic events

**Table S3.** Model performance statistics for different events at various sites using the mean prediction from the nearshore surrogate.

| Site          | Event              | G     | $R^2$ | MSE    | L2Norm  |
|---------------|--------------------|-------|-------|--------|---------|
| Rikuzentakata | FUJI2011_42        | 0.106 | 0.18  | 10.196 | 125.919 |
|               | SANRIKU1896        | 0.17  | 0.508 | 0.246  | 22.612  |
|               | SANRIKU1933        | 0.2   | 0.419 | 0.717  | 35.587  |
|               | TOKACHI1968        | 0.046 | 0.895 | 0.201  | 44.266  |
|               | YAMAZAKI2018_TPMOD | 0.058 | 0.566 | 4.044  | 106.158 |
| Ishinomaki    | FUJI2011_42        | 0.099 | 0.562 | 1.727  | 83.648  |
|               | SANRIKU1896        | 0.433 | 0.378 | 0.012  | 4.404   |
|               | SANRIKU1933        | 0.145 | 0.777 | 0.037  | 13.236  |
|               | TOKACHI1968        | 0.173 | 0.672 | 0.012  | 6.189   |
|               | YAMAZAKI2018_TPMOD | 0.066 | 0.836 | 0.533  | 60.553  |
| Sendai        | FUJI2011_42        | 0.068 | 0.759 | 1.395  | 80.902  |
|               | SANRIKU1896        | 0.506 | 0.251 | 0.02   | 5.292   |
|               | SANRIKU1933        | 0.325 | 0.431 | 0.1    | 13.566  |
|               | TOKACHI1968        | 0.312 | 0.441 | 0.022  | 6.322   |
|               | YAMAZAKI2018_TPMOD | 0.144 | 0.507 | 1.724  | 61.162  |

**Table S4.** Model performance statistics for different events at various sites using the mean prediction from the onshore surrogate.

| <b>Site</b>   | <b>Event</b> | <b>G</b> | $R^2$  | <b>MSE</b> | <b>L2Norm</b> |
|---------------|--------------|----------|--------|------------|---------------|
| Rikuzentakata | FUJI2011_42  | 0.028    | 0.842  | 3.774      | 706.438       |
|               | SANRIKU1896  | 0.147    | 0.683  | 0.051      | 33.559        |
|               | SANRIKU1933  | 0.246    | 0.102  | 0.474      | 61.982        |
|               | TOKACHI1968  | 0.464    | 0.461  | 0.105      | 37.078        |
|               | YAMAZAKI2018 | 0.017    | 0.918  | 1.213      | 511.5         |
| Ishinomaki    | FUJI2011_42  | 0.285    | 0.262  | 3.712      | 747.957       |
|               | SANRIKU1896  | 0.275    | -0.684 | 0.001      | 6.475         |
|               | SANRIKU1933  | 0.097    | 0.691  | 0.003      | 24.125        |
|               | TOKACHI1968  | 0.161    | 0.48   | 0.001      | 9.82          |
|               | YAMAZAKI2018 | 0.041    | 0.896  | 0.158      | 337.745       |
| Sendai        | FUJI2011_42  | 0.153    | 0.429  | 2.575      | 1233.79       |
|               | SANRIKU1896  | 0.178    | 0.688  | 0.004      | 39.573        |
|               | SANRIKU1933  | 0.06     | 0.879  | 0.004      | 61.973        |
|               | TOKACHI1968  | 0.105    | 0.679  | 0.001      | 14.827        |
|               | YAMAZAKI2018 | 0.166    | 0.528  | 2.256      | 1108.09       |

## Predictions for Ishinomaki and Sendai

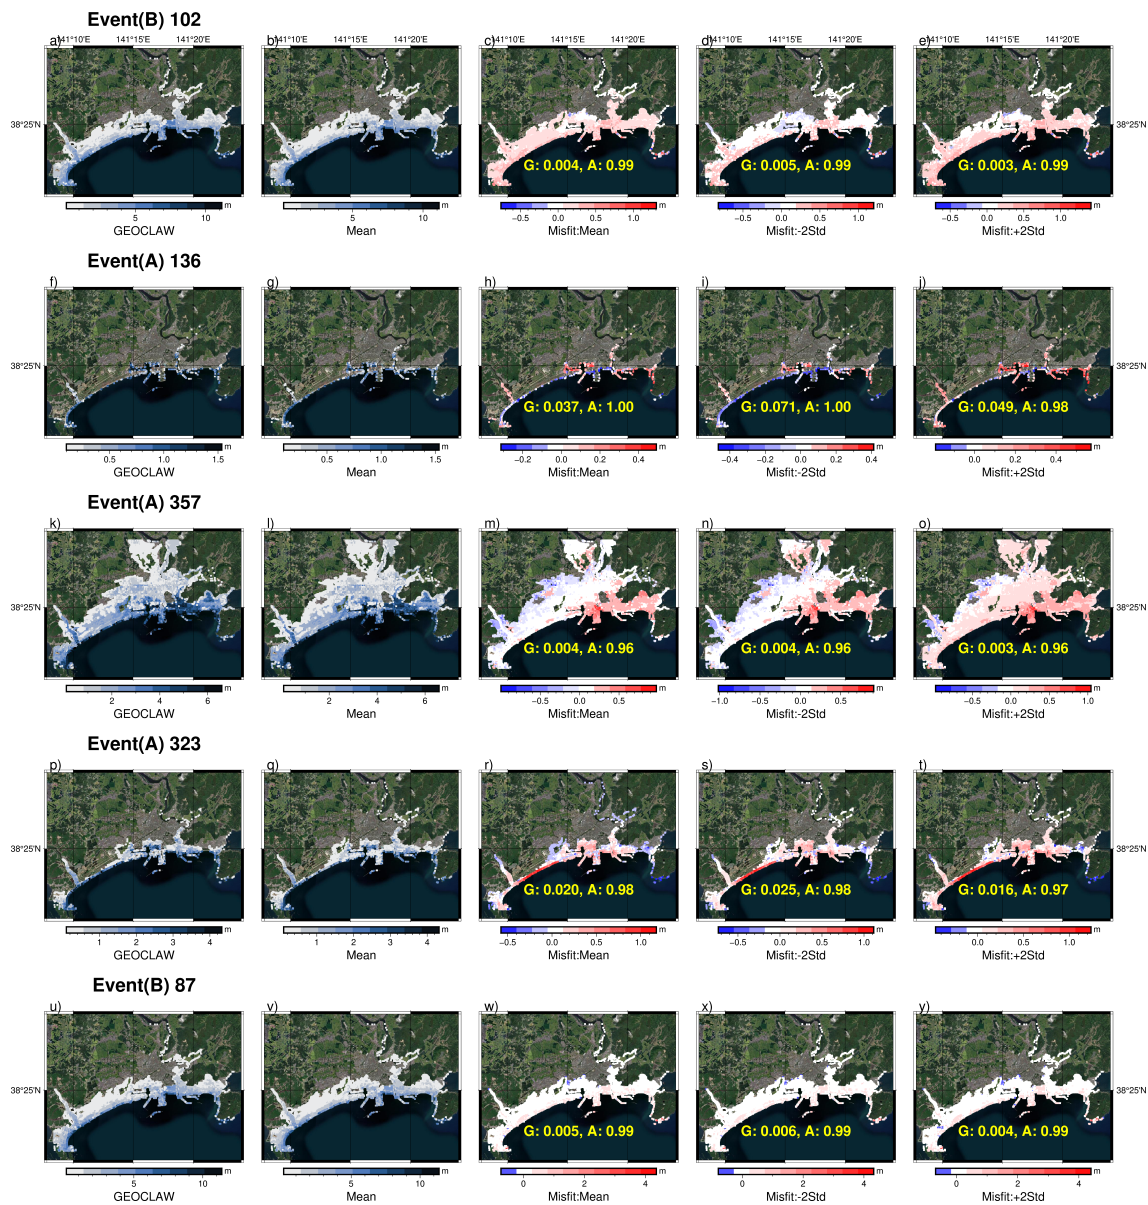

**Figure S3.** Prediction examples from the onshore surrogate at Ishinomaki for the test events.(Basemap from ESRI World Imagery)

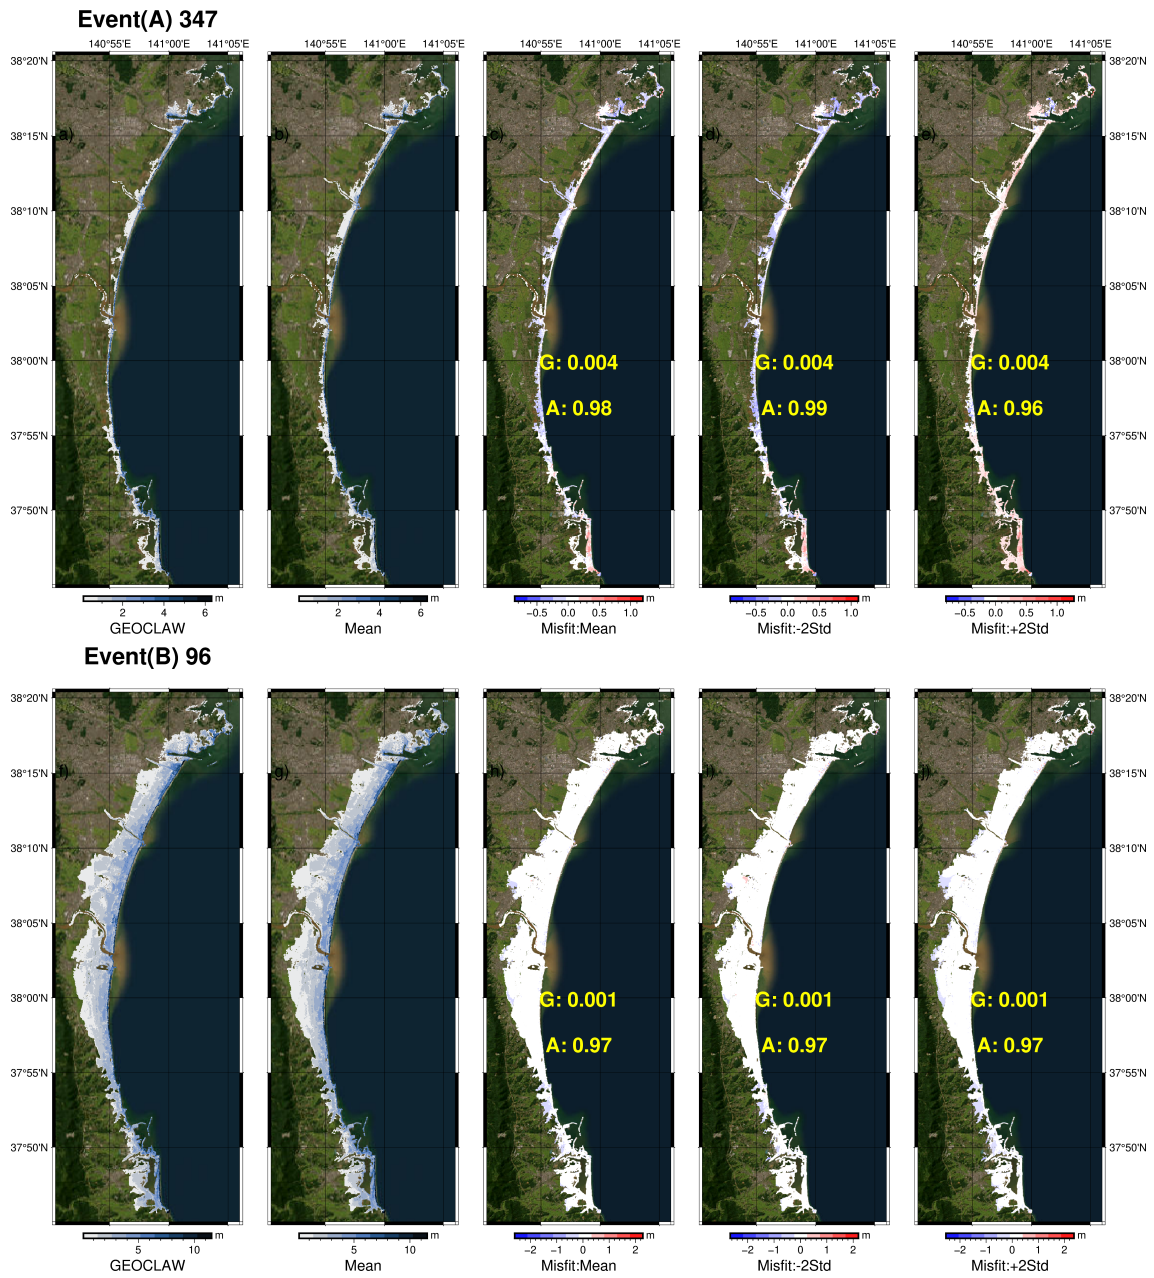

**Figure S4.** Prediction examples from the onshore surrogate at Sendai for the test events.(Basemap from ESRI World Imagery)



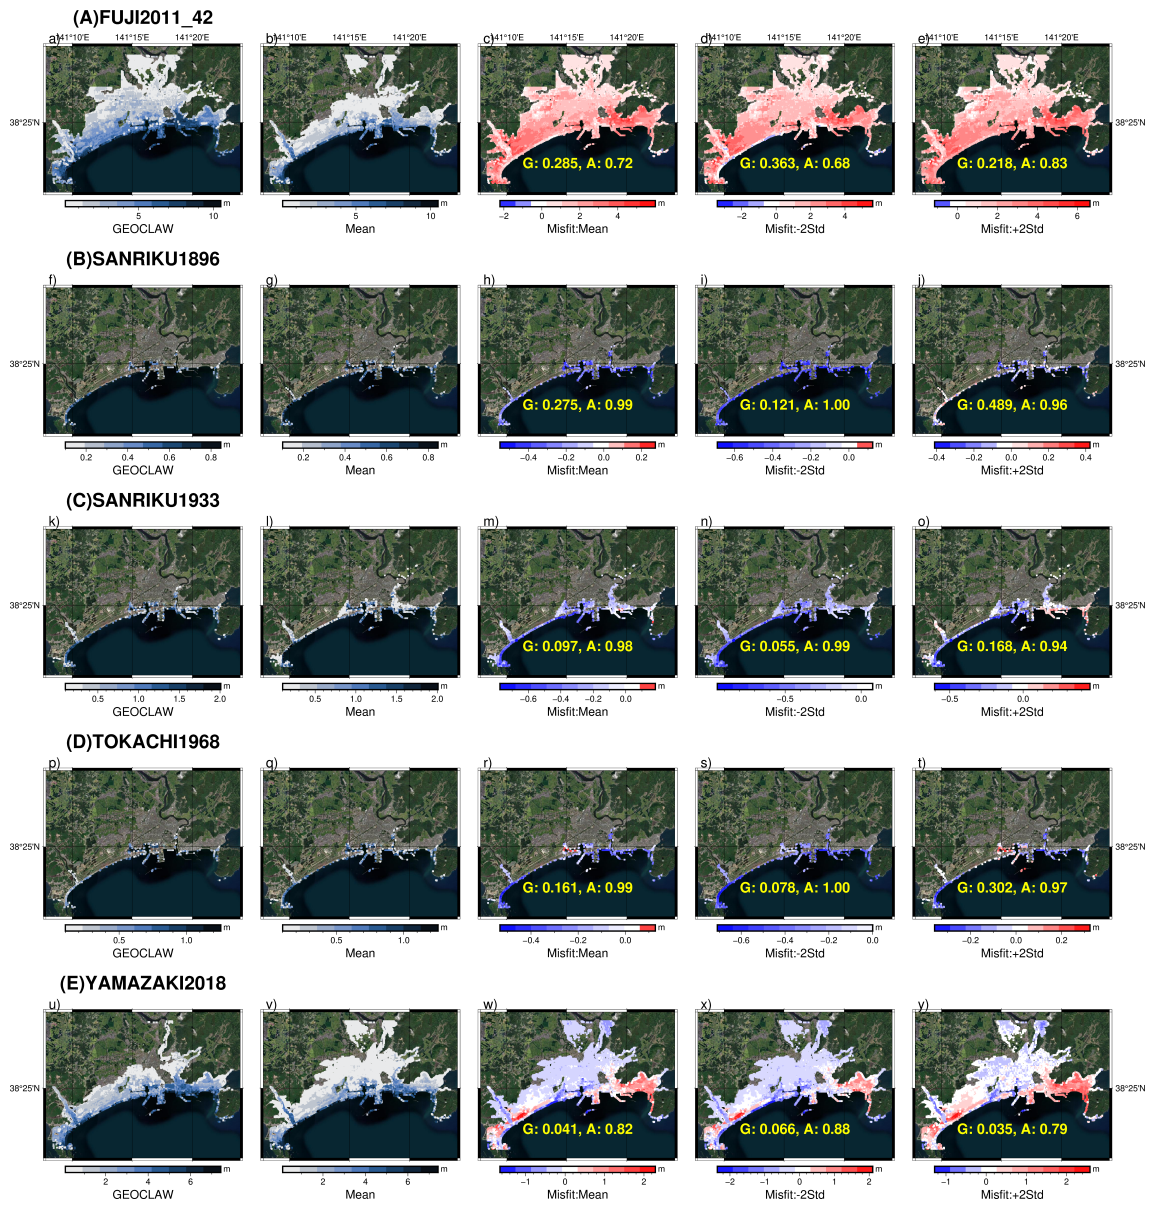

Figure S5. Historical prediction from the onshore surrogate at Ishinomaki.(Basemap from ESRI World Imagery)

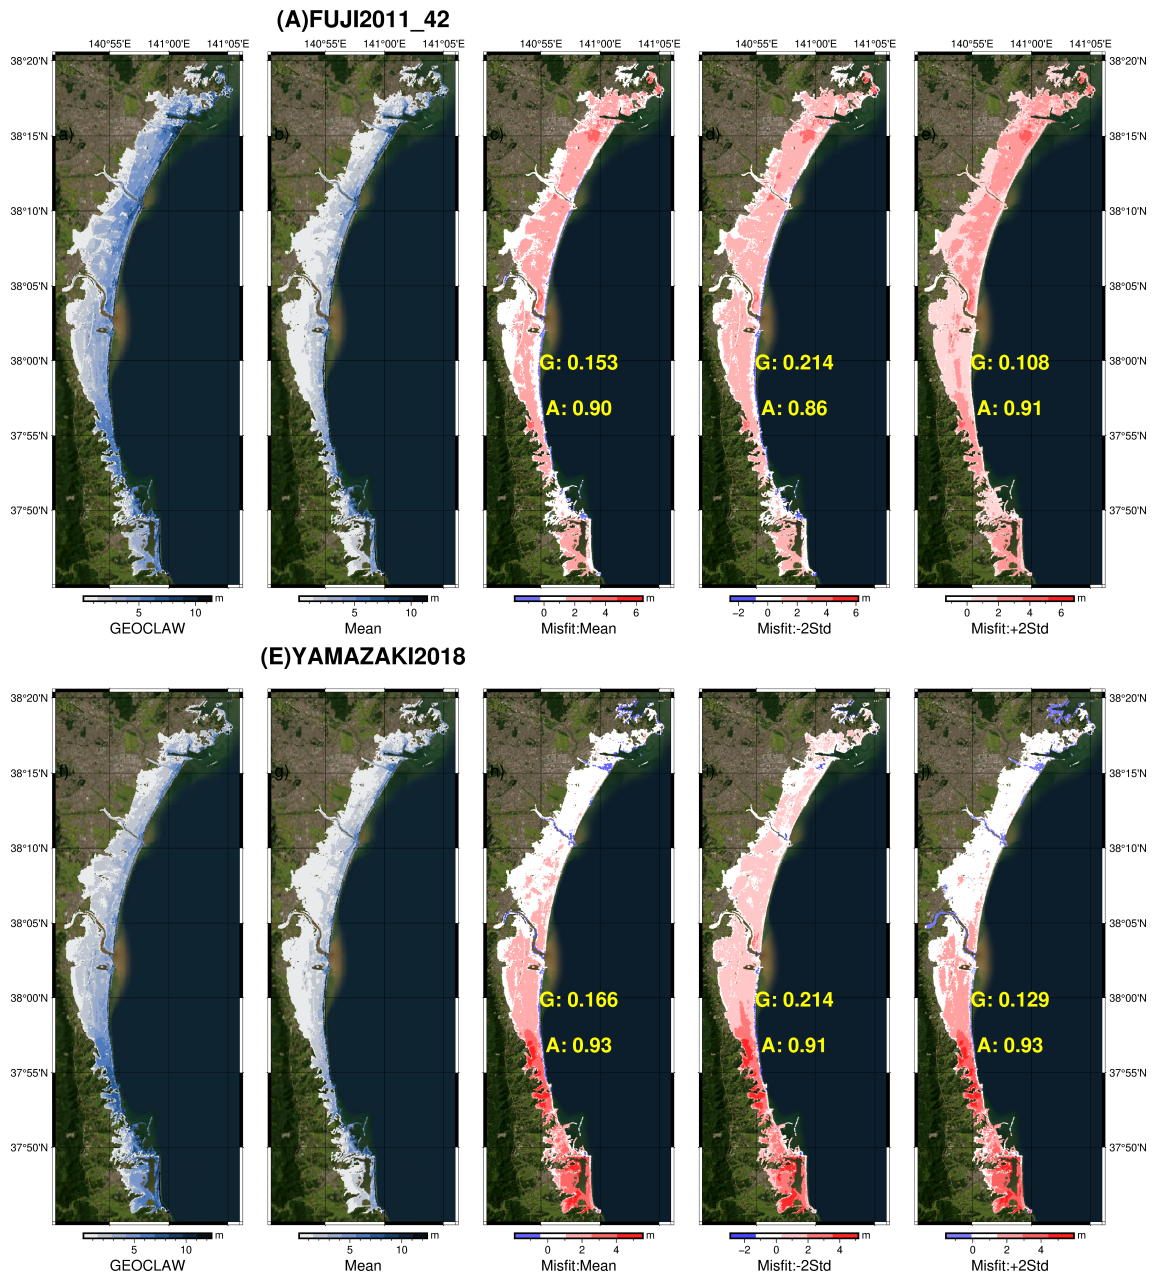

**Figure S6.** Historical prediction for 2011 Tohoku events from the onshore surrogate at Sendai.(Basemap from ESRI World Imagery)

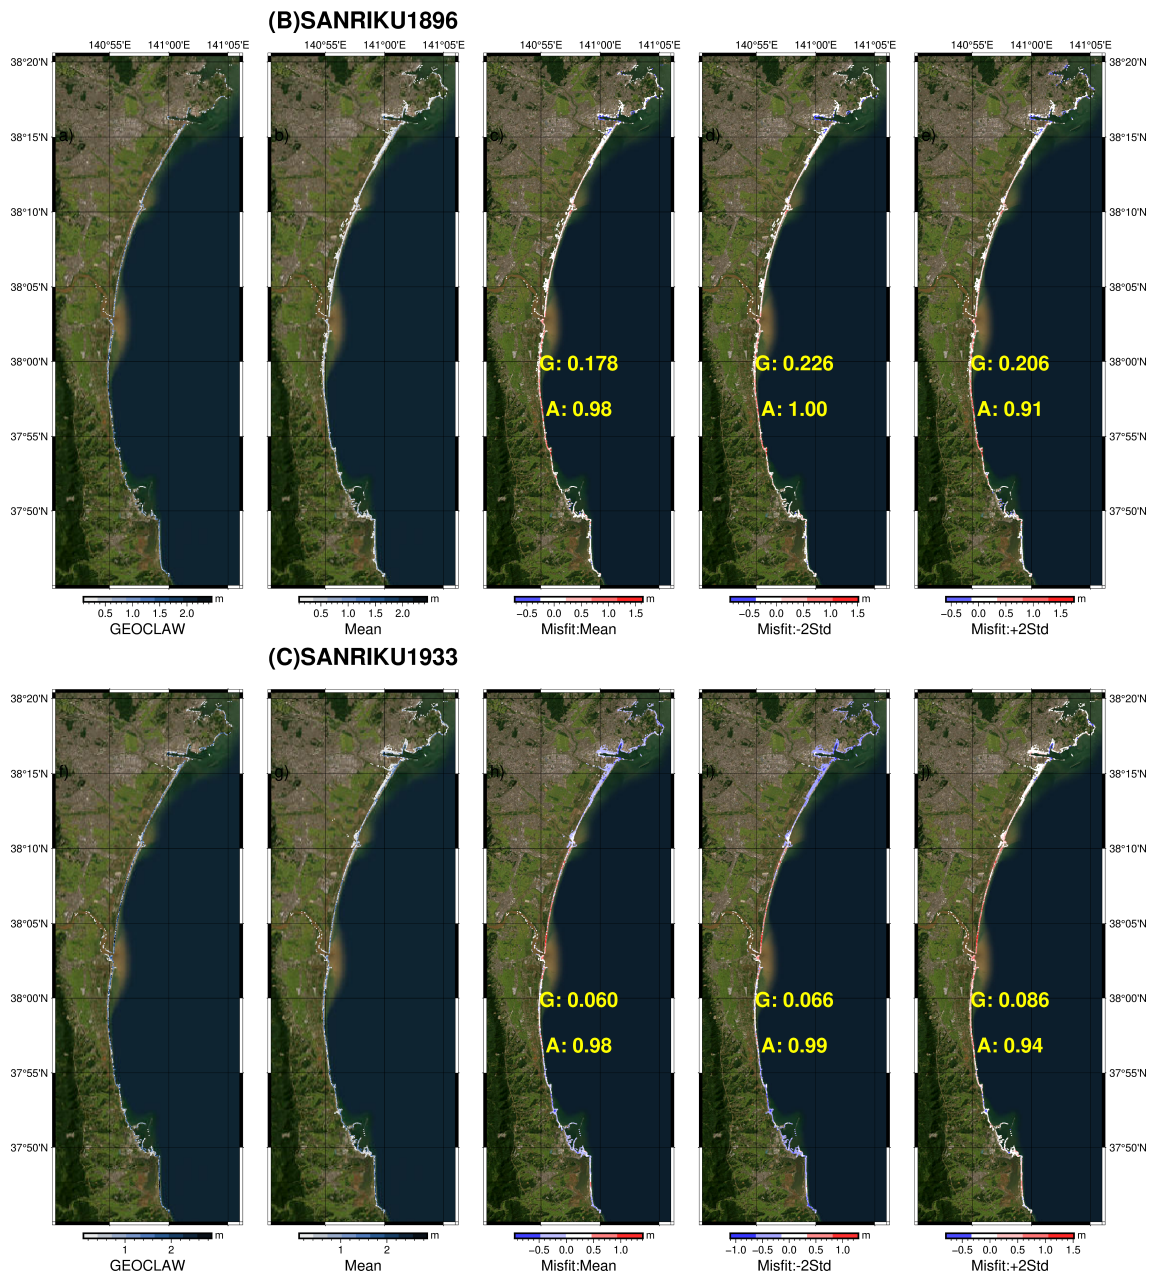

**Figure S7.** Historical prediction for the Sanriku events from the onshore surrogate at Sendai. (Basemap from ESRI World Imagery)

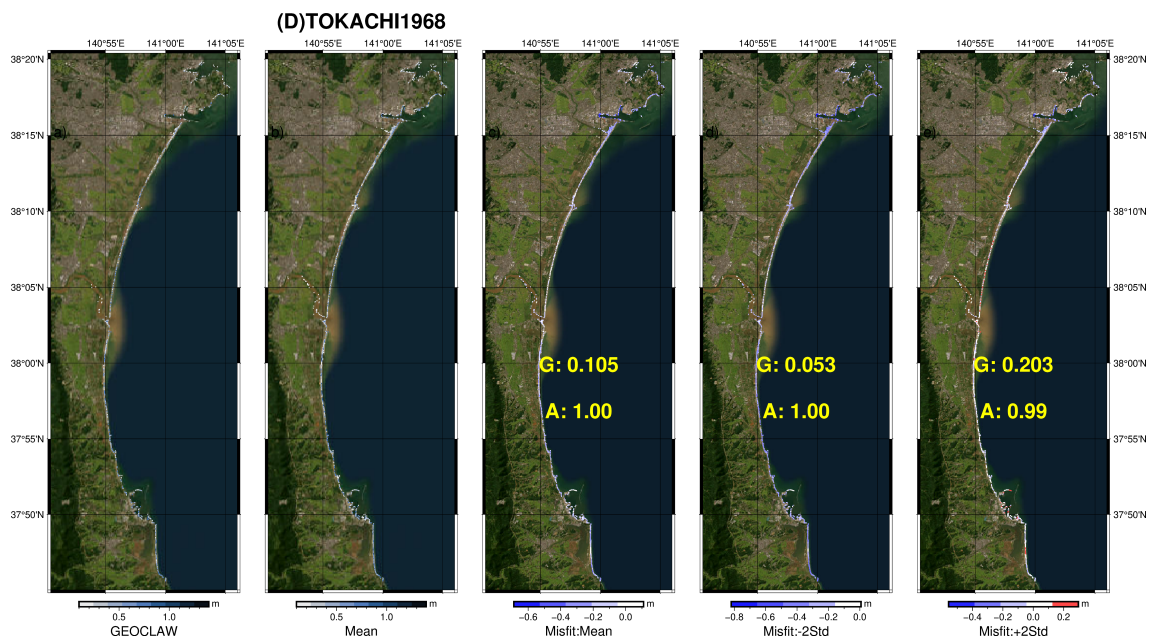

**Figure S8.** Historical prediction for the Tokachi-Oki event from the onshore surrogate at Sendai.(Basemap from ESRI World Imagery)

## Run time information for the tsunami numerical simulation and machine learning training

Below results are based on runs using CPU device - Intel Xeon Silver 4216 CPU @2.1 Ghz, 313 GB RAM and GPU device - NVIDIA A100 80GB. We do not consider and quantify the compute time for simulation and training runs conducted for calibration and tuning of the numerical and machine learning models.

**Table S5.** GeoClaw simulation

| Total Cell Updates     | Device type | Parallelisation | Time taken | No of events | Total compute time(hrs) |
|------------------------|-------------|-----------------|------------|--------------|-------------------------|
| $0.531 \times 10^{11}$ | CPU         | 10 CPU threads  | 3.45 hrs   | 564          | 1945                    |

**Table S6.** Machine Learning training

|                            | Region        | Max epoch | Time taken(sec) | No of folds | Total training time(min) |
|----------------------------|---------------|-----------|-----------------|-------------|--------------------------|
| <b>Nearshore Surrogate</b> | Rikuzentakata | 3000      | 54              | 5           | 4.5                      |
|                            | Ishinomaki    | 3000      | 72              | 5           | 6                        |
|                            | Sendai        | 4000      | 73              | 5           | 6                        |
| <b>Onshore Surrogate</b>   | Rikuzentakata | 20000     | 156             | 5           | 13                       |
|                            | Ishinomaki    | 20000     | 167             | 5           | 14                       |
|                            | Sendai        | 20000     | 177             | 5           | 15                       |
| <b>Total</b>               |               |           |                 |             | 58.5                     |
